# Supplementary material
Source: PubMed Central journal article supplement (PMC3672226)
Supplement: NIHMS435145-supplement-Supplement.pdf [file NIHMS435145-supplement-Supplement.pdf]

## Supplementary Figures

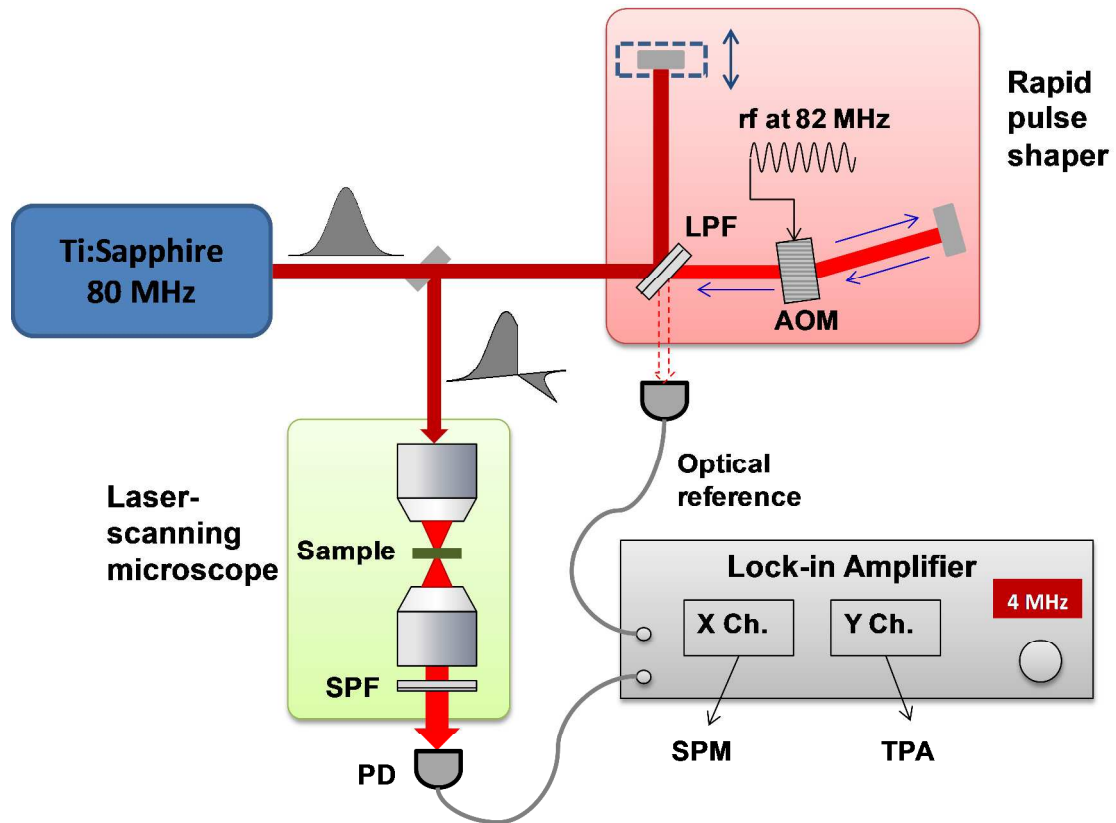

**Figure S1 | Experimental setup for spectral reshaping nonlinear optical microscopy.** A train of femtosecond laser pulses are converted into the desired pulse shapes by a rapid pulse shaper and sent into a home-built laser scanning microscope, where graphene samples are examined in a transmission mode. A lock-in amplifier is used to record the nonlinear optical signals with a reference produced by the remaining output from the pulse shaper. LPF, long-pass filter; AOM, acousto-optic modulator; SPF, short-pass filter; PD, amplified photodetector.

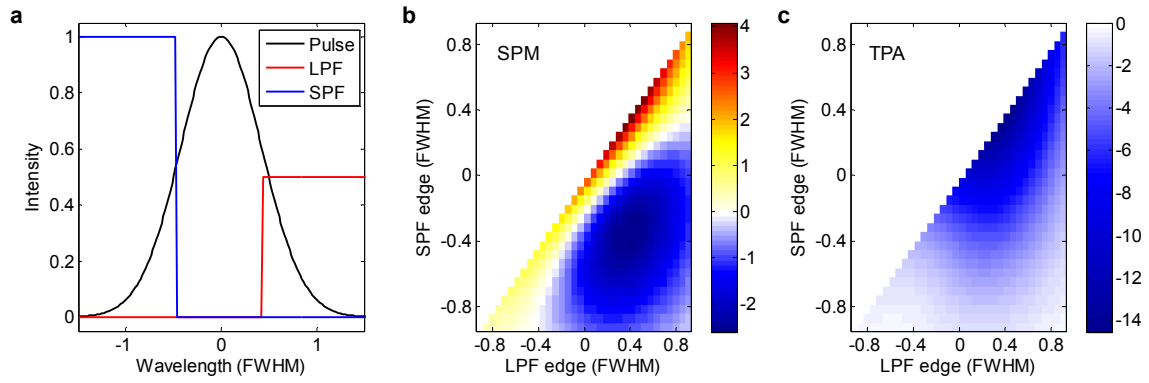

**Figure S2 | Numerical calculation of SPM and TPA signals. a,** short-pass filter (SPF) and long-pass filter (LPF) position. **b, c** SPM and TPA signals as a function of SPF and LPF edge positions.

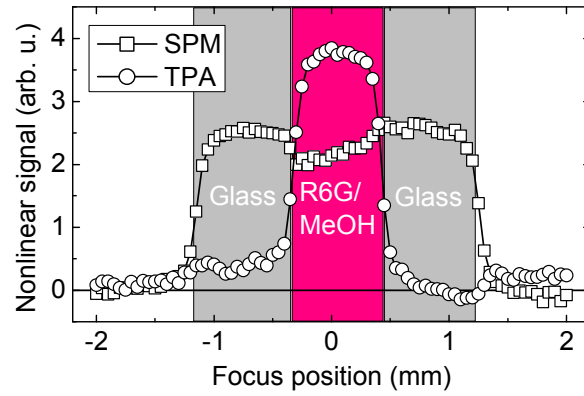

**Figure S3 | SPM and TPA measurement of a quartz cuvette filled with 20 mM Rhodamine 6G in methanol.** Input power is 1.5 mW, and lock-in time constant is 100 ms. From this result,  $\beta$  is estimated to be 1.7.

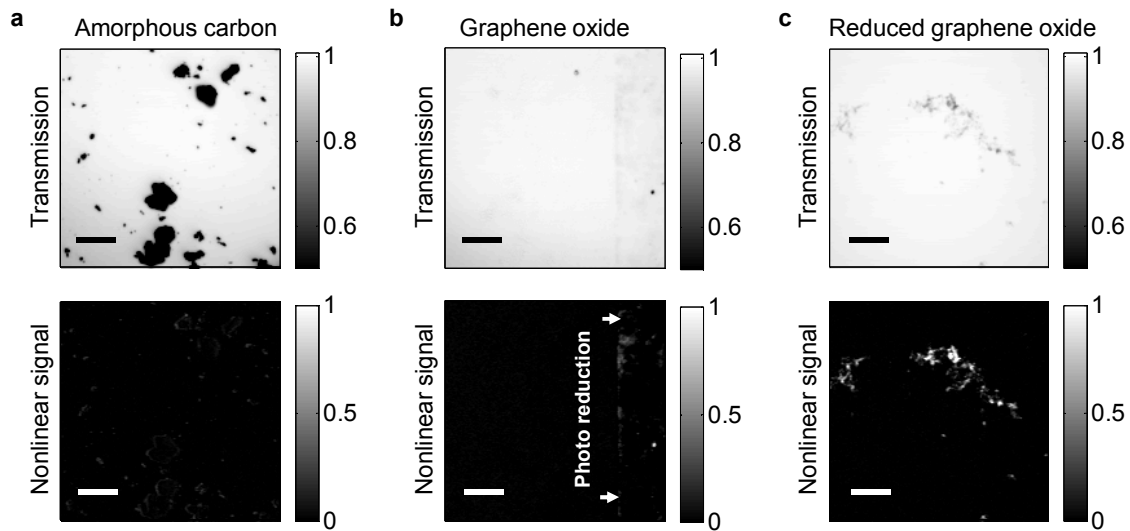

**Figure S4 | Transmission and nonlinear optical images of amorphous carbon (a), graphene oxide (b) and reduced graphene oxide (c).** No appreciable nonlinear optical signal is generated in amorphous carbon and graphene oxide. Long-time exposure to stronger laser power levels causes photo-induced reduction in graphene oxide and produces nonlinear optical signals.

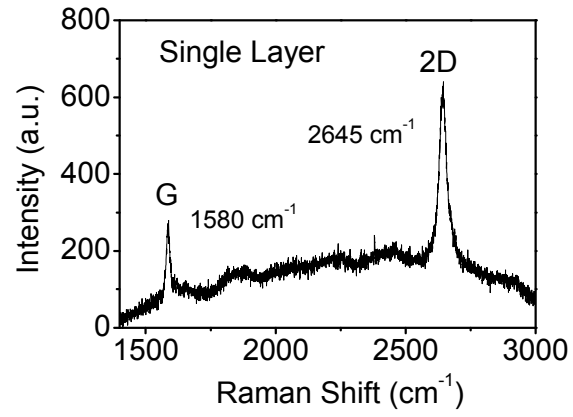

**Figure S5 | Raman Spectrum of the single layer graphene in Fig.2b region 1.** The 2D peak is higher than (almost twice as large as) the G peak, showing we have a single layer in this region.

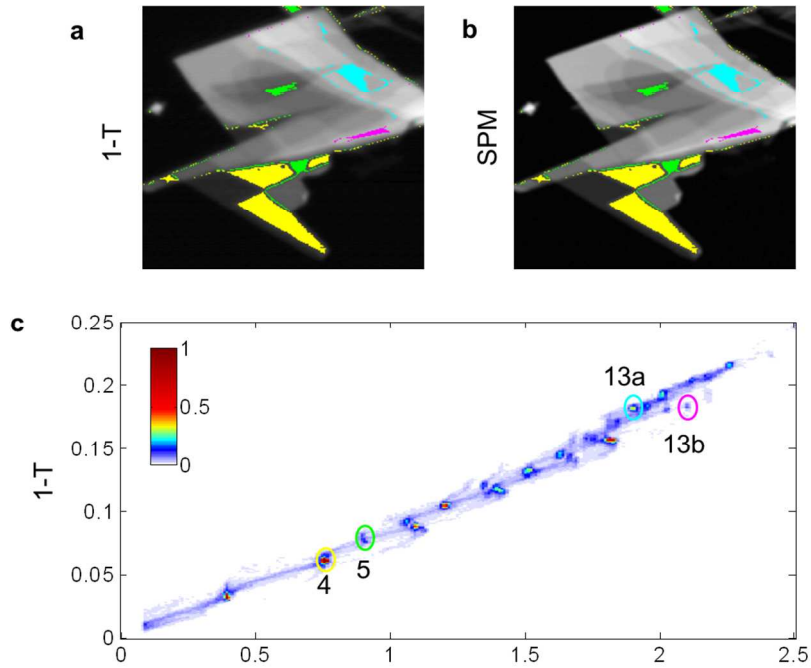

**Figure S6 | Layer counting in few layer graphene flakes.** **a**, Transmission contrast. **b**, SPM contrast in the same region. **c**, 2D histogram of transmission and SPM contrast, where colored circles label the region with certain number of layers obtained from transmission. These regions are highlighted in **a**, **b** in the corresponding colors. 13A and 13B denote regions with same number of layers at different locations. They produce different SPM signal because they experienced slightly different laser power.

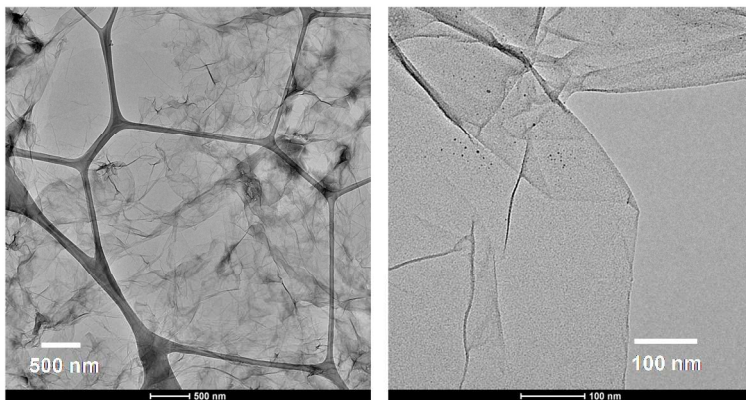

**Figure S7 | TEM images of reduced graphene oxide**
